# Supplementary material for: Activation of p21 by HDAC Inhibitors Requires Acetylation of H2A.Z
Source: PubMed Central journal article supplement (PMC3548890; doi:10.1371/journal.pone.0054102), 2013-01-18

Fig. S1

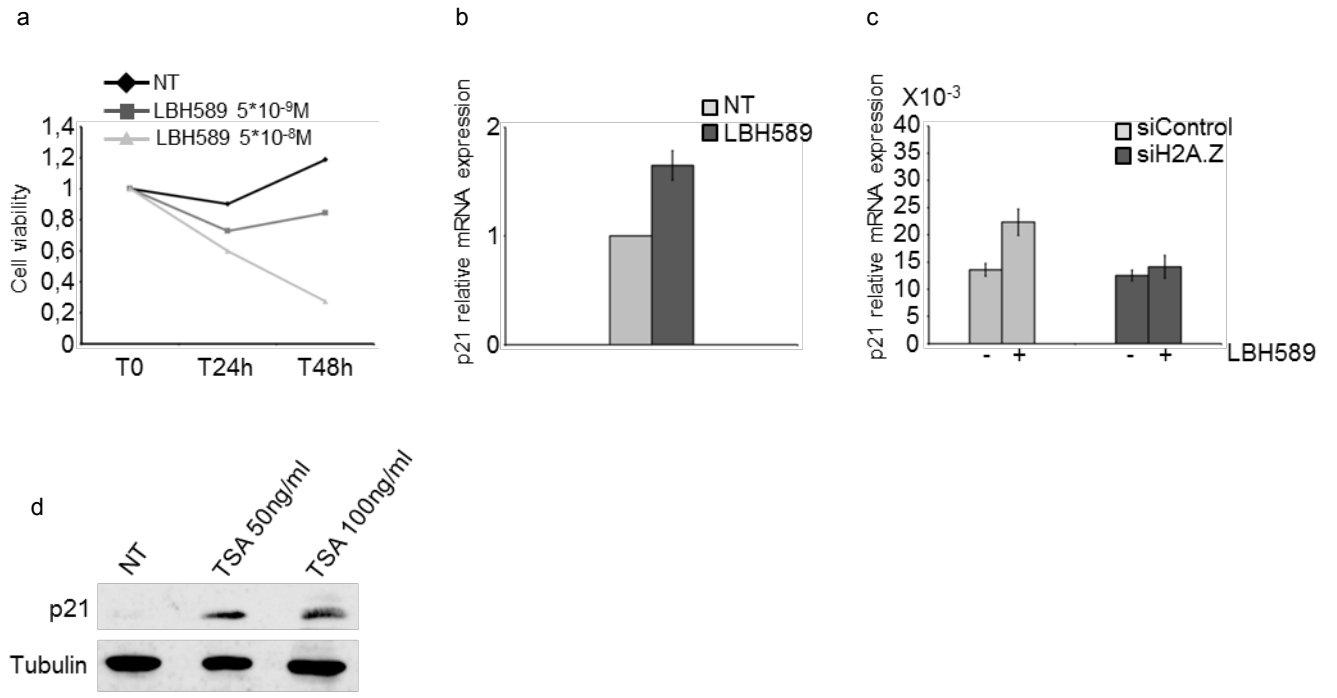

Supplement: pone.0054102.s001.pdf [file pone.0054102.s001.pdf]
